# Supplementary material for: Ionic mitigation of CD4+ T cell metabolic fitness, Th1 central nervous system autoimmunity and Th2 asthmatic airway inflammation by therapeutic zinc
Source: PubMed Central journal article supplement (PMC8816938; doi:10.1038/s41598-022-04827-6), 2022-02-04
Supplement: 41598_2022_4827_MOESM1_ESM.pdf [file 41598_2022_4827_MOESM1_ESM.pdf]

## Supplementary information

### Supplemental Table 1: GWAS identify MYC as potential risk gene for the development of allergic asthma and multiple sclerosis.

#### Allergic asthma

| Gene | SNP        | OR   | p-value                | Publication               |
|------|------------|------|------------------------|---------------------------|
| MYC  | rs13277355 | 1.11 | 1.65x10 <sup>-10</sup> | Pividori, M. et al., 2019 |

#### Multiple sclerosis

| Gene | SNP       | OR   | p-value                 | Publication           |
|------|-----------|------|-------------------------|-----------------------|
| MYC  | rs4410871 | 1.09 | 7.70 x10 <sup>-09</sup> | Gourraud et al., 2012 |

### Supplemental Table 2: Antibodies used for FACS analyses

| Antigen      | Clone    | Company          | Fluorochrom   |
|--------------|----------|------------------|---------------|
| CD62L        | MEL-14   | BioLegend        | AlexaFluor488 |
| CD44         | IM7      | BioLegend        | PE            |
| CD25         | 3C7      | BioLegend        | FITC          |
| CD44         | IM7      | BioLegend        | FITC          |
| CD4          | RM4-5    | BioLegend        | APC           |
| CD45         | 30-F11   | BioLegend        | BV570         |
| CD4          | RM4-5    | BioLegend        | PacificBlue   |
| PD-1         | 29F.1A12 | BioLegend        | PE            |
| CXCR5        | L138D7   | BioLegend        | PE/Cy7        |
| B220         | RA3-6B2  | BioLegend        | FITC          |
| GATA3        | 16E10A23 | BioLegend        | APC           |
| IL-4         | 11B11    | BioLegend        | PE-Cy7        |
| IL-4         | 11B11    | BioLegend        | PE            |
| IL-13        | eBio13A  | ThermoScientific | AF488         |
| TNF $\alpha$ | MP6-XT22 | BioLegend        | APC           |
| MYC          | D84C12   | Cell Signaling   | N/A           |

# Suppl. Figure 1

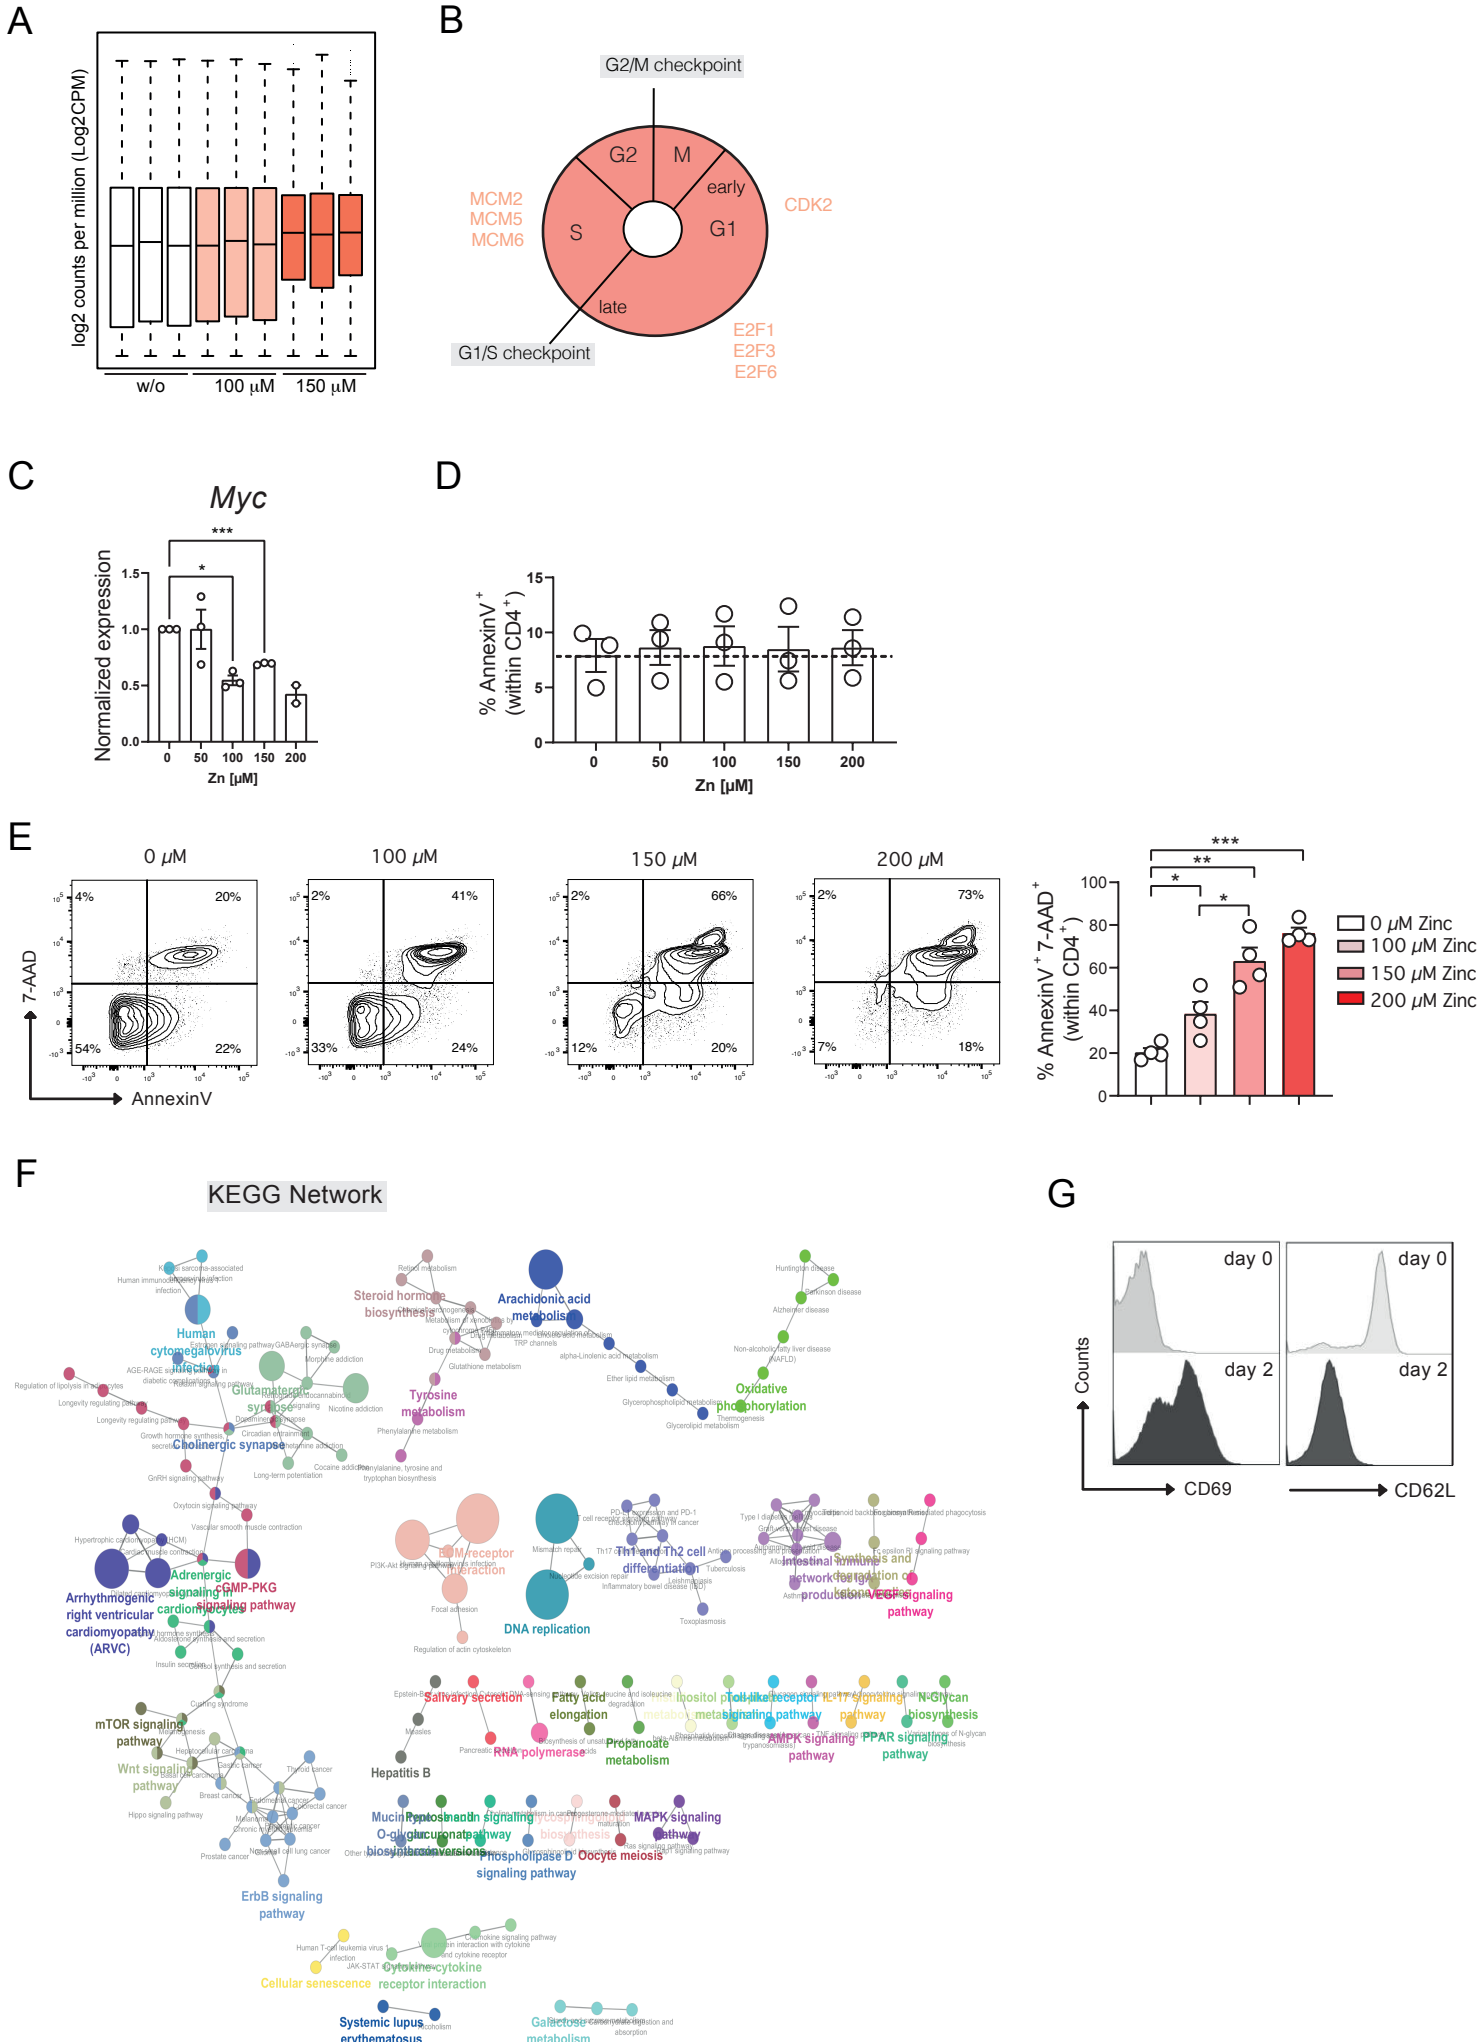

**Suppl. Figure 1: High dose zinc aspartate controls gene expression and metabolic fitness of CD4<sup>+</sup> T cells.**

A, Boxplot showing log<sub>2</sub> counts per million of the individual biological samples for RNA seq.

B, Cell cycle phases with the indicated genes out of Figure 1E.

C, OT-II TCR tg CD4<sup>+</sup> T cells were activated for 6 hrs in the absence and presence of the indicated zinc concentrations. Graphs show normalized gene expression of *Myc* determined by qRT-PCR and using the housekeeping genes *Gapdh*. Data are from 3 mice (except for 200 μM, here 2 mice were analyzed).

D, OT-II TCR tg CD4<sup>+</sup> T cells were activated for 6 hrs in the absence and presence of the indicated zinc concentrations and analyzed for early apoptosis using AnnexinV staining and flow cytometry. Data are from 3 mice.

E, OT-II TCR tg CD4<sup>+</sup> T cells were activated for 48 hrs in the absence and presence of the indicated zinc concentrations and analyzed for cell death using AnnexinV and 7-AAD staining and flow cytometry. Data are from 4 mice.

F, KEGG network analysis of bulk RNA sequencing data as shown in Figure 1.

G, Representative stainings for CD69 and CD62L of 2D2 TCR tg T cells before and after activation as described in Figure 5E.

RNA sequencing data in A was generated in biological triplicates from 3 mice per group. Data in C and D are from 3 mice. Data in E are from 4 mice. Every dot represents one mouse. Statistical analysis in C-E by one-way ANOVA followed by Tukey's honestly significant difference (HSD) post hoc test for multiple comparisons.  $p^* < 0.05$ ,  $**p < 0.01$ ,  $***p < 0.001$ .
